# Supplementary material for: Preparing LiNi0.5Mn1.5O4 nanoplates with superior properties in lithium-ion batteries using bimetal–organic coordination-polymers as precursors
Source: Royal Society of Chemistry journal article supplement (doi:10.1039/c4ta01147c), 2014-01-01
Supplement: c4ta01147c1.pdf [file c4ta01147c1.pdf]

Cite this: DOI: 10.1039/c0xx00000x

www.rsc.org/xxxxxx

ARTICLE TYPE

## Electronic Supplementary Information

**Title: Preparing  $\text{LiNi}_{0.5}\text{Mn}_{1.5}\text{O}_4$  Nanoplates with Superior Properties in Lithium-ion Batteries Using Bimetal-Organic Coordination-Polymer as Precursors (ID: TA-ART-01-2014-000505)**

5 Shifeng Yang,<sup>a,b</sup> Jian Chen,<sup>\*a</sup> Yingjia Liu<sup>a</sup> and Baolian Yi<sup>a</sup>

Received (in XXX, XXX) Xth XXXXXXXXXX 20XX, Accepted Xth XXXXXXXXXX 20XX

DOI: 10.1039/b000000x

<sup>a</sup>Advanced rechargeable battery Laboratory, Dalian Institute of Chemical

10 Physics, Chinese Academy of Sciences, 457 Zhongshan Road, Dalian 116023, China. Fax: +86-411-84379687; Tel: +86-411-84379687  
E-mail: chenjian@dicp.ac.cn;

<sup>b</sup>Graduate School of the Chinese Academy of Sciences, Beijing 100049, China

15 †Electronic Supplementary Information (ESI) available:

The crystal structures of NiMn-CPs and Ni-Mn-O were investigated by X-ray diffractometry (XRD, X' pert PRO MPD) using Cu K $\alpha$  radiation ( $\lambda=0.15418$  nm) with a scanning rate of 5°/min between 10° and 80°. The FT-IR spectra were collected using KBr discs on Fourier Transform

20 Infrared spectrometer (FT-IR, VERTEX70) in the range of 4000 ~ 400  $\text{cm}^{-1}$ .

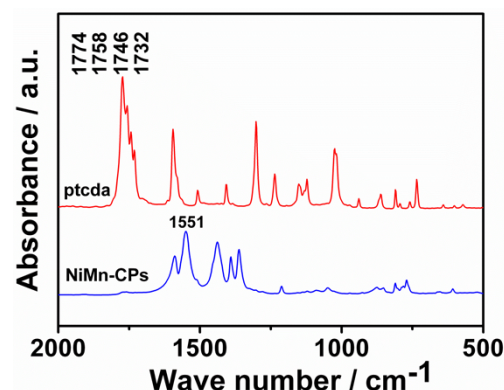

Figure †S2. IR spectrum of ptcds (the starting material) and Ni, Mn-ptcds coordination polymers (NiMn-CPs)

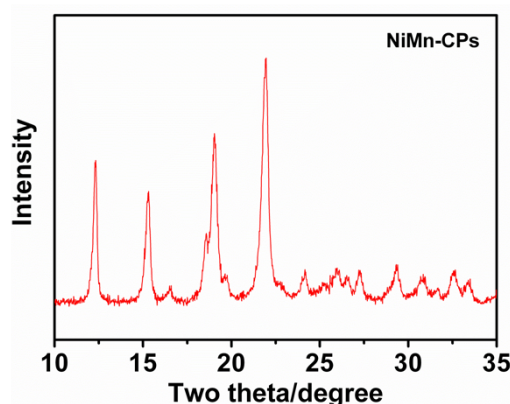

25 Figure †S1. XRD pattern of Ni, Mn-ptcds coordination polymers (NiMn-CPs) obtained after hydrothermal reaction

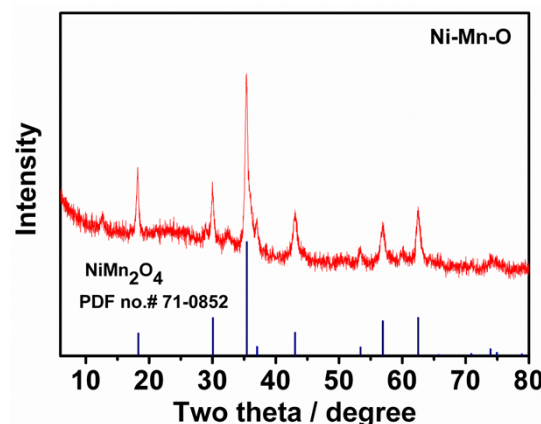

30 Figure †S3. X-ray diffraction patterns of Ni-Mn-O obtained by thermal decomposition of NiMn-CPs
